# Supplementary material
Source: publisher site journal article supplement (https://www.degruyterbrill.com/publication/isbn/9783486711172/downloadAsset/9783486711172_Inhaltsverzeichnis.pdf)
Supplement: Supplementary file 1 [file 9783486711172_Inhaltsverzeichnis.pdf]

# Inhaltsübersicht

Vorbemerkung

v-vi

Einleitung:

Tourismus – ein blinder Fleck der Politologie

1-15

Staat und Politik

17-48

Die politischen Akteure

49-112

Staat und Tourismus

113-204

Supranationale Tourismuspolitik: Akteure

205-252

Tourismus und Entwicklungspolitik

253-306

Tourismus und Umweltpolitik

307-349

Supranationale Tourismuspolitik: Themen (*issues*)

351-419

Literatur

421-442

Personenregister

443-447

Sachregister

449-462

Internetaktualisierung

[www.ba-ravensburg.de/~mundt/politb.htm](http://www.ba-ravensburg.de/~mundt/politb.htm)

# Inhaltsverzeichnis

|                                                                  |     |
|------------------------------------------------------------------|-----|
| Vorbemerkung                                                     | v   |
| Abkürzungsverzeichnis                                            | xi  |
| 1. EINLEITUNG: TOURISMUS – EIN BLINDER FLECK<br>DER POLITOLOGIE  | 1   |
| 2. STAAT UND POLITIK                                             | 17  |
| 2.1 Macht und Herrschaft                                         | 21  |
| 2.1.1 Macht                                                      | 22  |
| 2.1.2 Herrschaft                                                 | 23  |
| 2.1.3 Exkurs: Strukturbedingungen für den<br>Mißbrauch von Macht | 28  |
| 2.2 Rechtsstaat                                                  | 33  |
| 2.3 Formen rationaler Herrschaft                                 | 38  |
| 2.3.1 Beispiele föderaler Systeme                                | 40  |
| 2.3.2 Systeme zwischen Konkurrenz und Konkordanz                 | 44  |
| 3. DIE POLITISCHEN AKTEURE                                       | 49  |
| 3.1 Parteien                                                     | 50  |
| 3.1.1 Exkurs: Sozialpsychologische Aspekte<br>der Gruppenbildung | 53  |
| 3.1.2 Transparenz                                                | 54  |
| 3.1.3 Konflikt als Prinzip                                       | 57  |
| 3.1.4 Die Kosten des parteipolitischen Systems                   | 59  |
| 3.2 Interessengruppen                                            | 65  |
| 3.2.1 Arten und Typen von Interessengruppen                      | 66  |
| 3.2.1.1 Verbände                                                 | 69  |
| 3.2.1.1.1 Spezialfall Wohlfahrtsverbände                         | 76  |
| 3.2.1.2 Interessengruppen und Verbände<br>im Tourismus           | 77  |
| 3.2.1.2.1 Verbände privatwirtschaftlicher<br>Unternehmen         | 81  |
| 3.2.1.2.2 Verbände öffentlicher Tourismus-<br>förderung          | 89  |
| 3.2.1.2.3 Altruistische Verbände                                 | 93  |
| 3.3 Das Verhältnis zwischen Staat, Parteien und Verbänden        | 97  |
| 3.3.1 Neokorporatismus und Politikverflechtung                   | 99  |
| 3.4 Das Verhältnis von Medien und Politik                        | 106 |
| 4. STAAT UND TOURISMUS                                           | 113 |
| 4.1 Öffentliche und private Güter                                | 117 |
| 4.2 Zwischen <i>laisser-faire</i> und staatlichem Unternehmertum | 120 |
| 4.2.1 Ordnungs- und Prozeßpolitik                                | 126 |
| 4.2.2 Die veränderte Rolle des Staates                           | 129 |

|         |                                                                               |     |
|---------|-------------------------------------------------------------------------------|-----|
| 4.3     | Staatliche Tourismusförderung                                                 | 135 |
| 4.3.1   | Tourismusnetze ( <i>tourism clusters</i> )                                    | 140 |
| 4.3.2   | Kooperationen zwischen Staat und Unternehmen                                  | 143 |
| 4.3.2.1 | Lokale Tourismusstellen und ihre<br>Rechtsformen                              | 146 |
| 4.3.2.2 | Nationale Tourismusorganisationen                                             | 155 |
| 4.3.3   | Sozialtourismus                                                               | 165 |
| 4.4     | Steuern, Abgaben und Subventionen                                             | 172 |
| 4.4.1   | Luftverkehr                                                                   | 177 |
| 4.4.2   | Andere Verkehrsmittel                                                         | 183 |
| 4.4.3   | Tourismusspezifische kommunale Abgaben                                        | 184 |
| 4.5     | Planung                                                                       | 190 |
| 4.6     | Probleme staatlicher Administrationen                                         | 199 |
| 5.      | SUPRANATIONALE TOURISMUSPOLITIK: AKTEURE                                      | 205 |
| 5.1     | Internationale Organisationen                                                 | 208 |
| 5.1.1   | Politische Organisationen: Die Europäische Union                              | 211 |
| 5.1.1.1 | Ansätze europäischer Tourismuspolitik                                         | 215 |
| 5.1.1.2 | Das Subsidiaritätsprinzip in der EU                                           | 223 |
| 5.1.1.3 | Enger Tourismusbegriff                                                        | 225 |
| 5.1.1.4 | Europäische Perspektiven                                                      | 227 |
| 5.1.2   | Fachorganisation I: Die Internationale Zivile<br>Luftfahrtorganisation (ICAO) | 229 |
| 5.1.3   | Fachorganisation II: Die Welttourismusorganisation<br>(WTO)                   | 240 |
| 5.2     | Transnationale Organisationen                                                 | 243 |
| 5.2.1   | Fachorganisation: Vereinigung der<br>Luftverkehrsgesellschaften (IATA)        | 243 |
| 5.2.2   | Nichtregierungsorganisationen (NGO, NRO)                                      | 246 |
| 6.      | TOURISMUS UND ENTWICKLUNGSPOLITIK                                             | 253 |
| 6.1     | Parastaatlichkeit als Entwicklungshindernis                                   | 257 |
| 6.1.1   | Lokalitätsbezogene, konzentrische Ordnungen                                   | 258 |
| 6.1.2   | Rentenökonomien und Gewaltmärkte                                              | 262 |
| 6.1.3   | Der Staat als Kulisse für Entwicklungshilfe                                   | 266 |
| 6.1.4   | Verwaltung als Beute und die Verweigerung von<br>Eigentumsrechten             | 270 |
| 6.1.5   | Legalisierung statt monetärer Hilfe                                           | 274 |
| 6.2     | Modernisierung ohne Entwicklung                                               | 276 |
| 6.3     | Korruption als Entwicklungshindernis                                          | 279 |
| 6.4     | Tourismus als Initiator von Entwicklung?                                      | 281 |
| 6.4.1   | Exogene Entwicklungsimpulse                                                   | 285 |
| 6.4.2   | Endogene Chancen und Probleme                                                 | 288 |
| 6.5     | Perspektiven                                                                  |     |

|                                                                           |     |
|---------------------------------------------------------------------------|-----|
| 7. TOURISMUS UND UMWELTPOLITIK                                            | 307 |
| 7.1 Umweltpolitische Instrumente                                          | 310 |
| 7.2 Landschaft und Tourismus                                              | 316 |
| 7.2.1 Nationalparks und weitere Schutzgebiete                             | 318 |
| 7.3 Nachhaltiger Tourismus: Problematik eines Begriffes                   | 325 |
| 7.4 Tragekapazitäten von Tourismus                                        | 333 |
| 7.5 Umweltgütesiegel                                                      | 343 |
| 8. SUPRANATIONALE TOURISMUSPOLITIK: THEMEN ( <i>ISSUES</i> )              | 351 |
| 8.1 Sicherheit                                                            | 354 |
| 8.1.1 <i>Safety</i>                                                       | 356 |
| 8.1.1.1 Verkehrsmittel                                                    | 356 |
| 8.1.1.2 Gesundheit                                                        | 358 |
| 8.1.1.3 Naturkatastrophen                                                 | 363 |
| 8.1.2 <i>Security</i>                                                     | 363 |
| 8.1.2.1 Terrorismus                                                       | 364 |
| 8.1.2.2 Krieg                                                             | 374 |
| 8.1.2.3 Unruhen und Bürgerkriege                                          | 376 |
| 8.1.2.4 Belästigung und Kriminalität                                      | 377 |
| 8.1.3 Menschenrechtspolitik                                               | 382 |
| 8.2 Internationale Wettbewerbspolitik                                     | 388 |
| 8.2.1 IATA- <i>Interlining</i>                                            | 390 |
| 8.2.2 Luftverkehrsrechte                                                  | 391 |
| 8.2.3 Allokationspolitik: Gerechter Zugang zu den<br>Flughafenkapazitäten | 395 |
| 8.3 Beschäftigungspolitik durch Tourismusförderung                        | 399 |
| 8.4 Tourismus als Mittel der Integrationspolitik in der EU                | 404 |
| 8.5 Sextourismus                                                          | 407 |
| 8.5.1 Kinderprostitution                                                  | 410 |
| 8.6 Internationale Umweltpolitik I: Lärmschutz von Flugzeugen             | 413 |
| 8.7 Internationale Umweltpolitik II: Kreuzfahrtschiffe                    | 416 |
| Literatur                                                                 | 421 |
| Personenregister                                                          | 443 |
| Sachregister                                                              | 449 |
